# Supplementary material for: Stromal FOXF2 suppresses prostate cancer progression and metastasis by enhancing antitumor immunity
Source: PubMed Central journal article supplement (PMC9652358; doi:10.1038/s41467-022-34665-z), 2022-11-11
Supplement: 41467_2022_34665_MOESM1_ESM.pdf [file 41467_2022_34665_MOESM1_ESM.pdf]

## Supplementary Information

### **Stromal FOXF2 suppresses prostate cancer progression and metastasis by enhancing antitumor immunity**

Deyong Jia<sup>1</sup>, Zhicheng Zhou<sup>1</sup>, Oh-Joon Kwon<sup>1</sup>, Li Zhang<sup>1</sup>, Xing Wei<sup>1</sup>, Yiqun Zhang<sup>2</sup>, Mingyang Yi<sup>3</sup>, Martine P Roudier<sup>1</sup>, Mary C Regier<sup>4,5</sup>, Ruth Dumpit<sup>6</sup>, Peter S Nelson<sup>6</sup>, Mark Headley<sup>6</sup>, Lawrence True<sup>5</sup>, Daniel W Lin<sup>1</sup>, Colm Morrissey<sup>1</sup>, Chad J Creighton<sup>2</sup>, Li Xin<sup>1,4,7</sup>

## Supplementary Figure 1

**a**

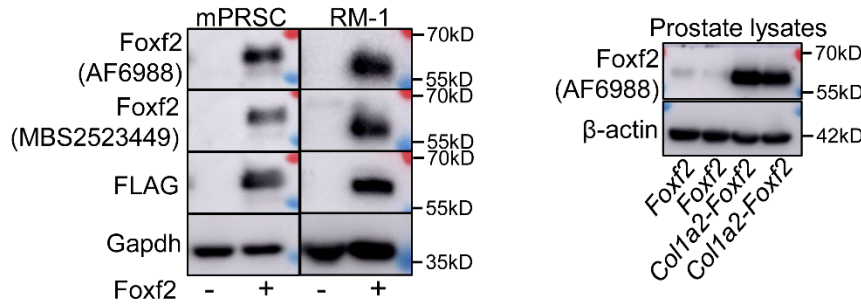

**b**

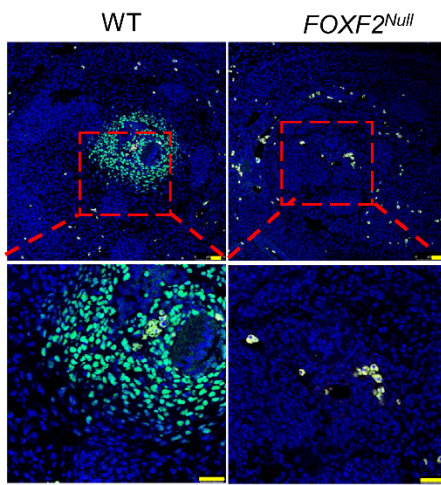

**c**

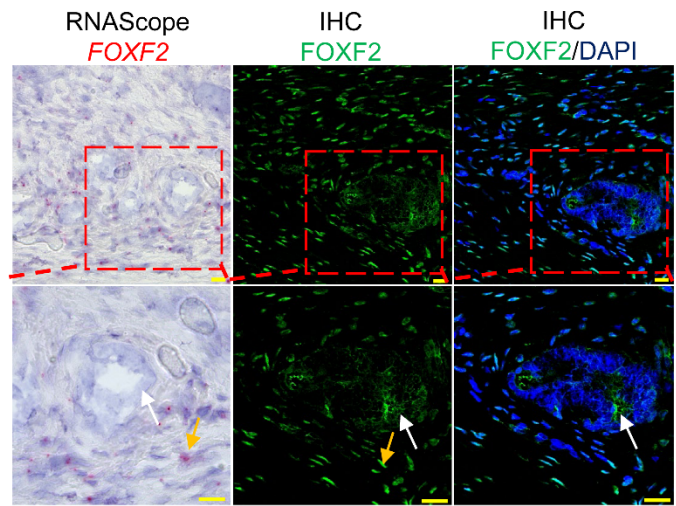

**d**

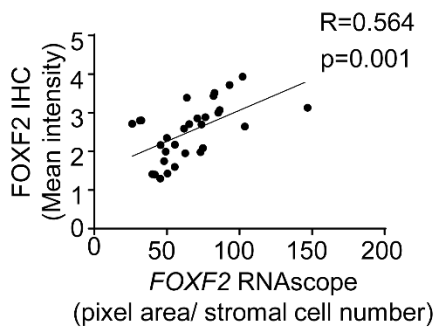

**e**

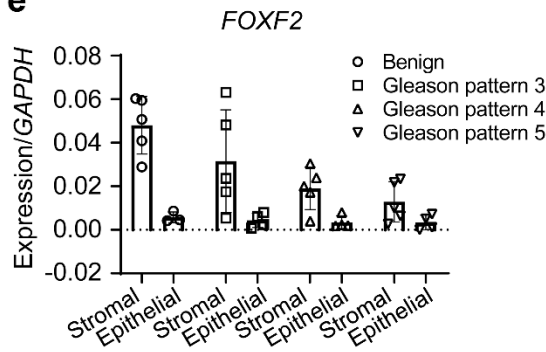

### Supplementary Fig. 1: Stromal FOXF2 expression inversely correlates with Gleason patterns.

(a) Western blot analyses of mouse prostate stromal cells and RM-1 cells that ectopically expressed a 3xFLAG-tagged *Foxf2* and prostate tissues from tamoxifen-treated *R26-LSL-Foxf2* (*Foxf2*) and *Col1a2-CreER<sup>T2</sup>;R26-LSL-Foxf2* (*Col1a2-Foxf2*) mice using sheep (AF6988 from R&D) and rabbit (MBS2523449 from MyBioSource) anti-Foxf2 antibodies. Experiments were repeated three times with similar observation. Source data are provided in Supplementary Fig. 13. (b) Immunostaining of Foxf2 in wild type (WT) and *Foxf2* null embryos. Areas framed by red dotted rectangle show

staining of Foxf2 in eye tissue of WT but not null mouse. Bars = 25  $\mu$ m. Experiments were repeated twice with similar observation. (c) RNA-in-situ analysis of *FOXF2* in human prostate cancer specimens (Left panels) shows no sign of *FOXF2* expression in tumor cells (white arrow, lower left panel) where immunostaining display unspecific staining by anti-Foxf2 antibody (white arrows, lower middle and lower right panels). Bars = 25  $\mu$ m. Image represents staining obtained from 1 out of 7 specimens. (d) Dot plot shows positive correlation between intensity of immunostaining of stromal FOXF2 and that of RNA in Situ analysis for *FOXF2* in stromal cells of normal human prostate tissues by Person Correlation analysis. Each dot represents signal intensity of FOXF2 and *FOXF2* collected from the corresponding fields on sequential slides. N=30 region from 7 specimens. (e) qRT-PCR analysis of Foxf2 in laser-captured epithelial (benign and tumor, N=15 regions) and stromal cells (N=20 regions) from a total of 13 benign human prostate tissues and prostate cancer specimens. Data represent means  $\pm$  s.d.

## Supplementary Figure 2

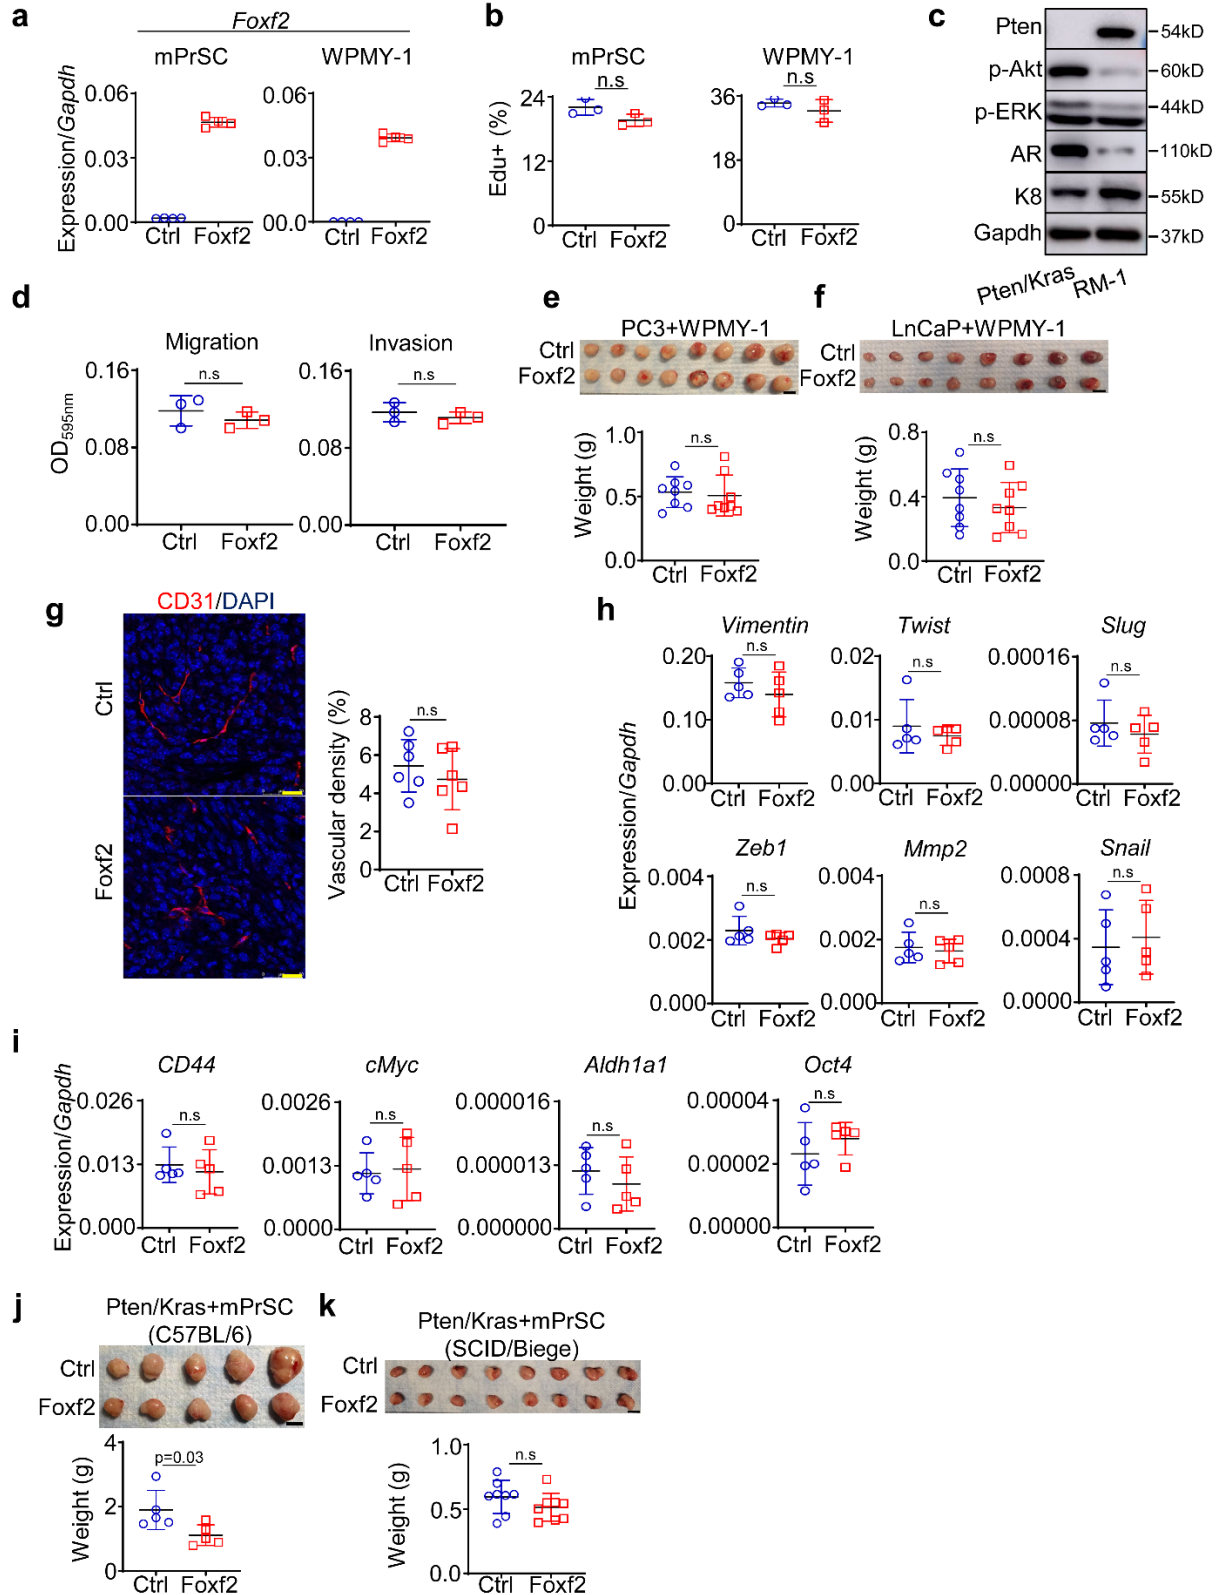

**Supplementary Fig. 2: Stromal Foxf2 overexpression does not affect prostate cancer biology *in vitro* or in immunocompromised context *in vivo*.**

(a) QRT-PCR of *Foxf2* in control and Foxf2-expressing mouse prostate stromal cells (mPrSC) and WPMY-1 cells. Data represent means  $\pm$  s.d. from 4 independent experiments. (b) EdU incorporation assay. Data represent means  $\pm$  s.d. of percentages of EdU<sup>+</sup> cells from 3 independent experiments. Two-sided unpaired t-test. (c) Western blot analysis of RM-1 and Pten/Kras cells. Experiments were repeated for three times with similar pattern. Source data are provided in Supplementary Fig. 13. (d) Boyden chamber assays to determine the capacity of RM-1 cells for migration and invasion when culturing with mouse prostate stromal cells infected with control (Ctrl) and Foxf2-expressing (Foxf2) lentiviruses. OD<sub>595</sub> values reflect number of cells that have migrated or invaded through chambers. Data represent means  $\pm$  s.d. from 3 experiments. Two-sided unpaired t-test. (e) Image of subcutaneous tumors grown from PC3 cells cocultured with control and Foxf2-expressing WPMY-1 in SCID/Beige hosts. Bar = 1 cm. Dot plot shows means  $\pm$  s.d. of tumor weight. N=8 tumor per group. Two-sided unpaired t-test. (f) Image of subcutaneous tumors grown from LnCaP cells cocultured with control and Foxf2-expressing WPMY-1 in SCID/Beige hosts. Bar = 1 cm. Dot plot shows means  $\pm$  s.d. of tumor weight. N=8 per group. Two-sided unpaired t-test. (g) Immunostaining of CD31 in RM-1 xenografts grown in SCID/Biege hosts with control (Ctrl) and Foxf2-expressing (Foxf2) mouse prostate stromal cells. Dot plot shows means  $\pm$  s.d. of percentage of CD31 staining pixel per image field. Each dot represents average value of 10 images from each xenograft. Bars= 25 $\mu$ m. N=6 mice per group. Two-sided unpaired t-test. (h) QRT-PCR of EMT-related genes in RM-1 xenografts grown in SCID/Biege hosts with control (Ctr) and Foxf2-expressing (Foxf2) mouse prostate stromal cells. Data represent means  $\pm$  s.d. from 5 independent xenografts. Two-sided unpaired t-test. (i) QRT-PCR of cancer stem cell-related genes in RM-1 xenografts grown in SCID/Biege hosts with control (Ctrl) and Foxf2-expressing (Foxf2) mouse prostate stromal cells. Data represent means  $\pm$  s.d. from 5 independent xenografts. Two-sided unpaired t-test. (j) Image of subcutaneous tumors grown from Pten/Kras cells cocultured with control and Foxf2-expressing mouse prostate stromal cells (mPrSC) in male C57BL/6 hosts. Bar = 1 cm. Dot plot shows means  $\pm$  s.d. of tumor weight. N=5 xenografts. Two-sided unpaired t-test. (k) Image of subcutaneous tumors grown from Pten/Kras cells cocultured with control and Foxf2-expressing mouse prostate stromal cells (mPrSC) in SCID/Beige hosts. Bar = 1 cm. Dot plot shows means  $\pm$  s.d. of tumor weight. N=8 xenografts. Two-sided unpaired t-test.

**Supplementary Figure 3**

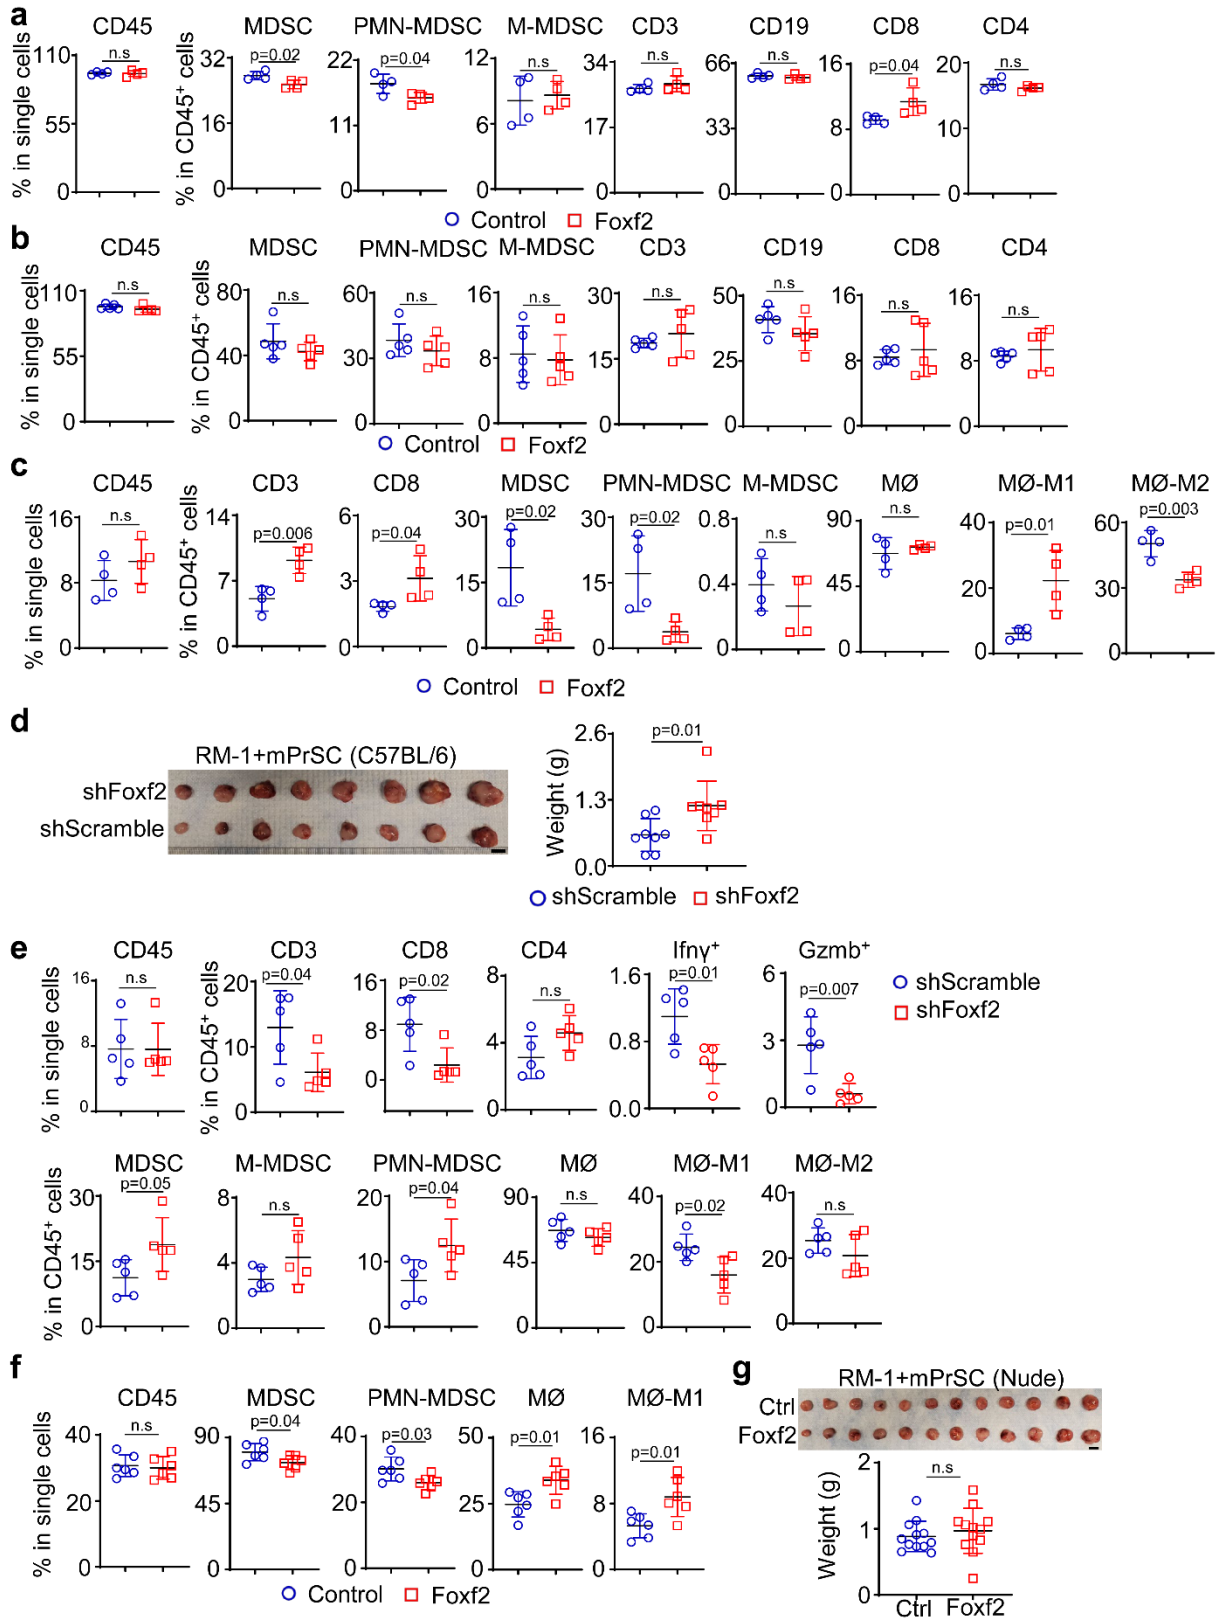

**Supplementary Fig. 3: Increasing stromal Foxf2 affects immuno-microenvironment *in vivo*.**

(a-b) FACS analyses of immune cells in spleen (a) and blood (b) of C57BL/6 mice harboring subcutaneous RM-1 tumors grown with control and *Foxf2*-expressing stromal cells. Dot plots show means  $\pm$  s.d. of cell percentages. N=4 (spleen) or 5 (blood). Two-sided unpaired t-test. (c) FACS analysis of immune cells in *Pten/Kras* tumors grown with control and *Foxf2*-expressing stromal cells in C57BL/6 hosts. Dot plots show means  $\pm$  s.d. of cell percentages. N=4 xenografts per group. Two-sided unpaired t-test. (d) Representative image of RM-1 tumors grown subcutaneously with mouse prostate stromal cells expressing scrambled shRNA (shScramble) or shRNA against *Foxf2* (sh*Foxf2*) in male C57BL/6 hosts. Dot plot shows means  $\pm$  s.d. of tumor weight. N=8 per group. Two-sided unpaired t-test. Bar = 1 cm. (e) Dot plots show means  $\pm$  s.d. of percentages of T cells (CD3, CD8, CD4), myeloid derived suppressor cells (M- and PMN-MDSC), and macrophages (M $\emptyset$ , M1 and M2) in RM-1 tumors grown with mouse prostate stromal cells expressing scrambled shRNA (shScramble) or shRNA against *Foxf2* (sh*Foxf2*). N=5 per group. Two-sided unpaired t-test. (f) FACS analysis of immune cells in RM-1 tumors grown with control and *Foxf2*-expressing stromal cells in SCID/Beige mice. Dot plots show means  $\pm$  s.d. of cell percentages. N=6 per group. Two-sided unpaired t-test. (g) Image of subcutaneous RM-1 tumors grown with control and *Foxf2*-expressing mouse prostate stromal cells in male nude mice. Bar= 1 cm. Dot plot shows means  $\pm$  s.d. of tumor weight. N=12 per group. Two-sided unpaired t-test.

### Supplementary Figure 4

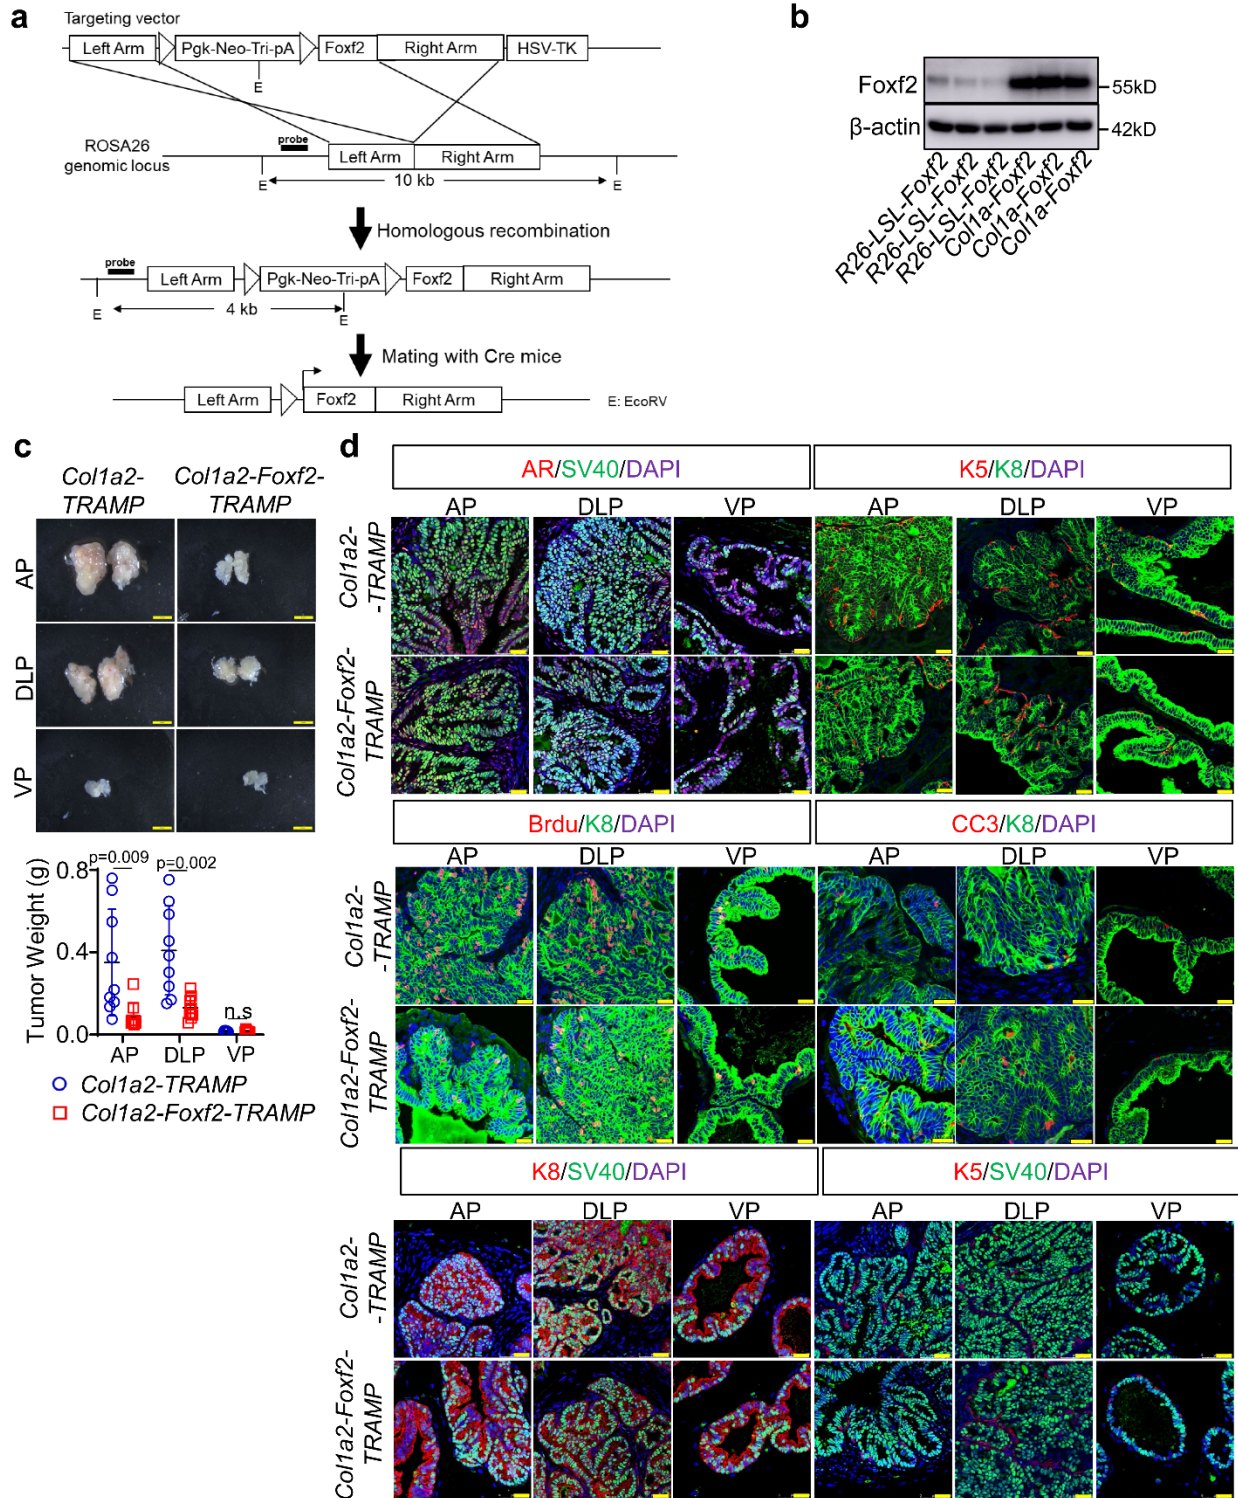

### Supplementary Fig. 4: Increasing stromal Foxf2 expression suppresses tumor progression in TRAMP mice.

(a) Schematic illustration of generation of *R26-LSL-Foxf2* model. (b) Western blot analysis of Foxf2 using FACS isolated prostate stromal cells from tamoxifen treated 10-wk-old control (*R26-*



*LSL-Foxf2*) and *Colla2-Foxf2* mice. Experiment was done once using 3 different specimens per group shown in the image. Source data are provided in Supplementary Fig. 13. (c) Transillumination images of anterior (AP), ventral (VP), and dorsolateral (DLP) prostates of 9-month-old control (*Colla2-TRAMP*) and *Colla2-Foxf2-TRAMP* mice. Dot plot shows means  $\pm$  s.d. of prostate weight. N=9 mice for AP and DLP; N=7 for VP. Two-sided unpaired t-test. Bars = 2 mm. (d) Coimmunostaining of AR and SV40 T, K5 and K8, BrdU and K8, and Cleaved caspase 3 (CC3) and K8 in AP, DLP, and VP of 9-month-old *Colla2-TRAMP* and *Colla2-Foxf2-TRAMP* mice. Bars = 25  $\mu$ m. Experiments were performed on 5 different mice with similar observations.

## Supplementary Figure 5

**a**

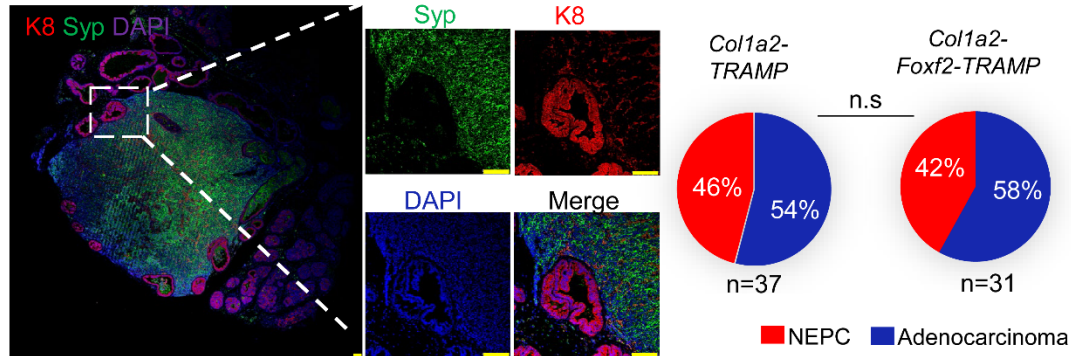

**b**

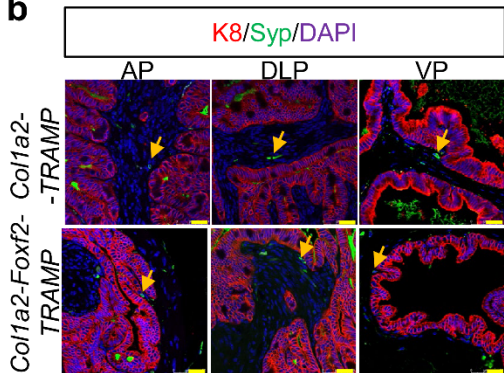

**c**

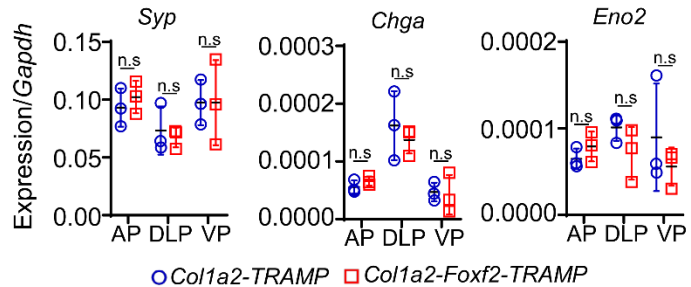

### Supplementary Fig. 5: Increasing stromal Foxf2 expression does not affect neuroendocrine prostate cancer (NEPC) frequency in TRAMP mice.

(a) Co-immunostaining of Keratin 8 (K8) and Synaptophysin (Syp) shows a representative focal NEPC in ventral prostate of a 9-mth-old *TRAMP* mouse. Enlarged region highlight interface between NEPC and adenocarcinoma. Pie charts show quantification of NEPC frequency in 31 *Col1a2-Foxf2-TRAMP* and 37 control *Col1a2-TRAMP* mice. Bars = 100 $\mu$ m. Fischer's exact test. (b) Co-immunostaining of Keratin 8 (K8) and Synaptophysin (Syp) of adenocarcinoma in anterior (AP), dorsolateral (DLP) and ventral (VP) prostates of 9-mth-old *Col1a2-Foxf2-TRAMP* and control *Col1a2-TRAMP* mice. Bars = 25 $\mu$ m. Yellow arrows point to Syp staining. Experiments were performed on 5 different mice with similar observations. (c) QRT-PCR of NEPC-associated genes in adenocarcinoma in anterior (AP), dorsolateral (DLP) and ventral (VP) prostates of 9-mth-old *Col1a2-Foxf2-TRAMP* and control *Col1a2-TRAMP* mice. Data represent means  $\pm$  s.d. from 3 tissues from different mice. Two-sided unpaired t-test.

### Supplementary Figure 6

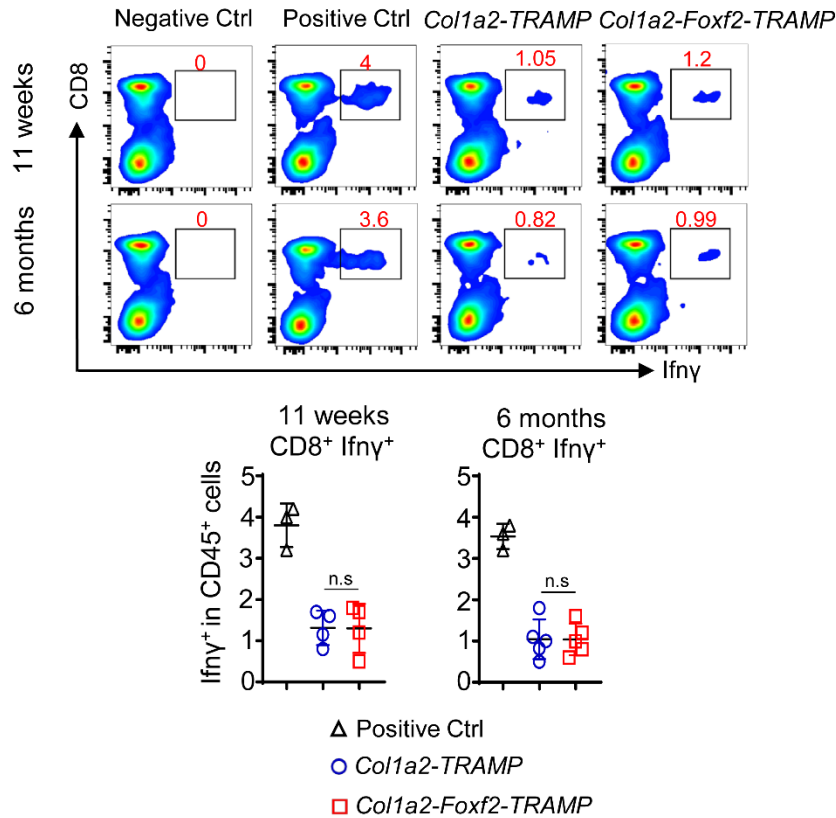

### Supplementary Fig. 6: Increasing stromal Foxf2 expression does not affect development of peripheral tolerance toward SV40 Tag in TRAMP mice.

11-wk-old and 6-mon-old *Col1a2-Foxf2-TRAMP* and control *Col1a2-TRAMP* mice were immunized with SV40 Tag-IV. Immunized and unimmunized age-match male C57BL/6 mice served as positive and negative controls, respectively. Splenocytes isolated from these mice were stimulated with SV40 Tag-IV. FACS plots show percentage of IFN $\gamma$ -expressing CD8<sup>+</sup> T cells. Data represent means  $\pm$  s.d. from 3 mice in positive control, 4 mice per group for 11-wk-old mice and 5 mice per group for 6-mon-old mice. One-way ANOVA with Tukey's multiple comparison test.

# Supplementary Figure 7

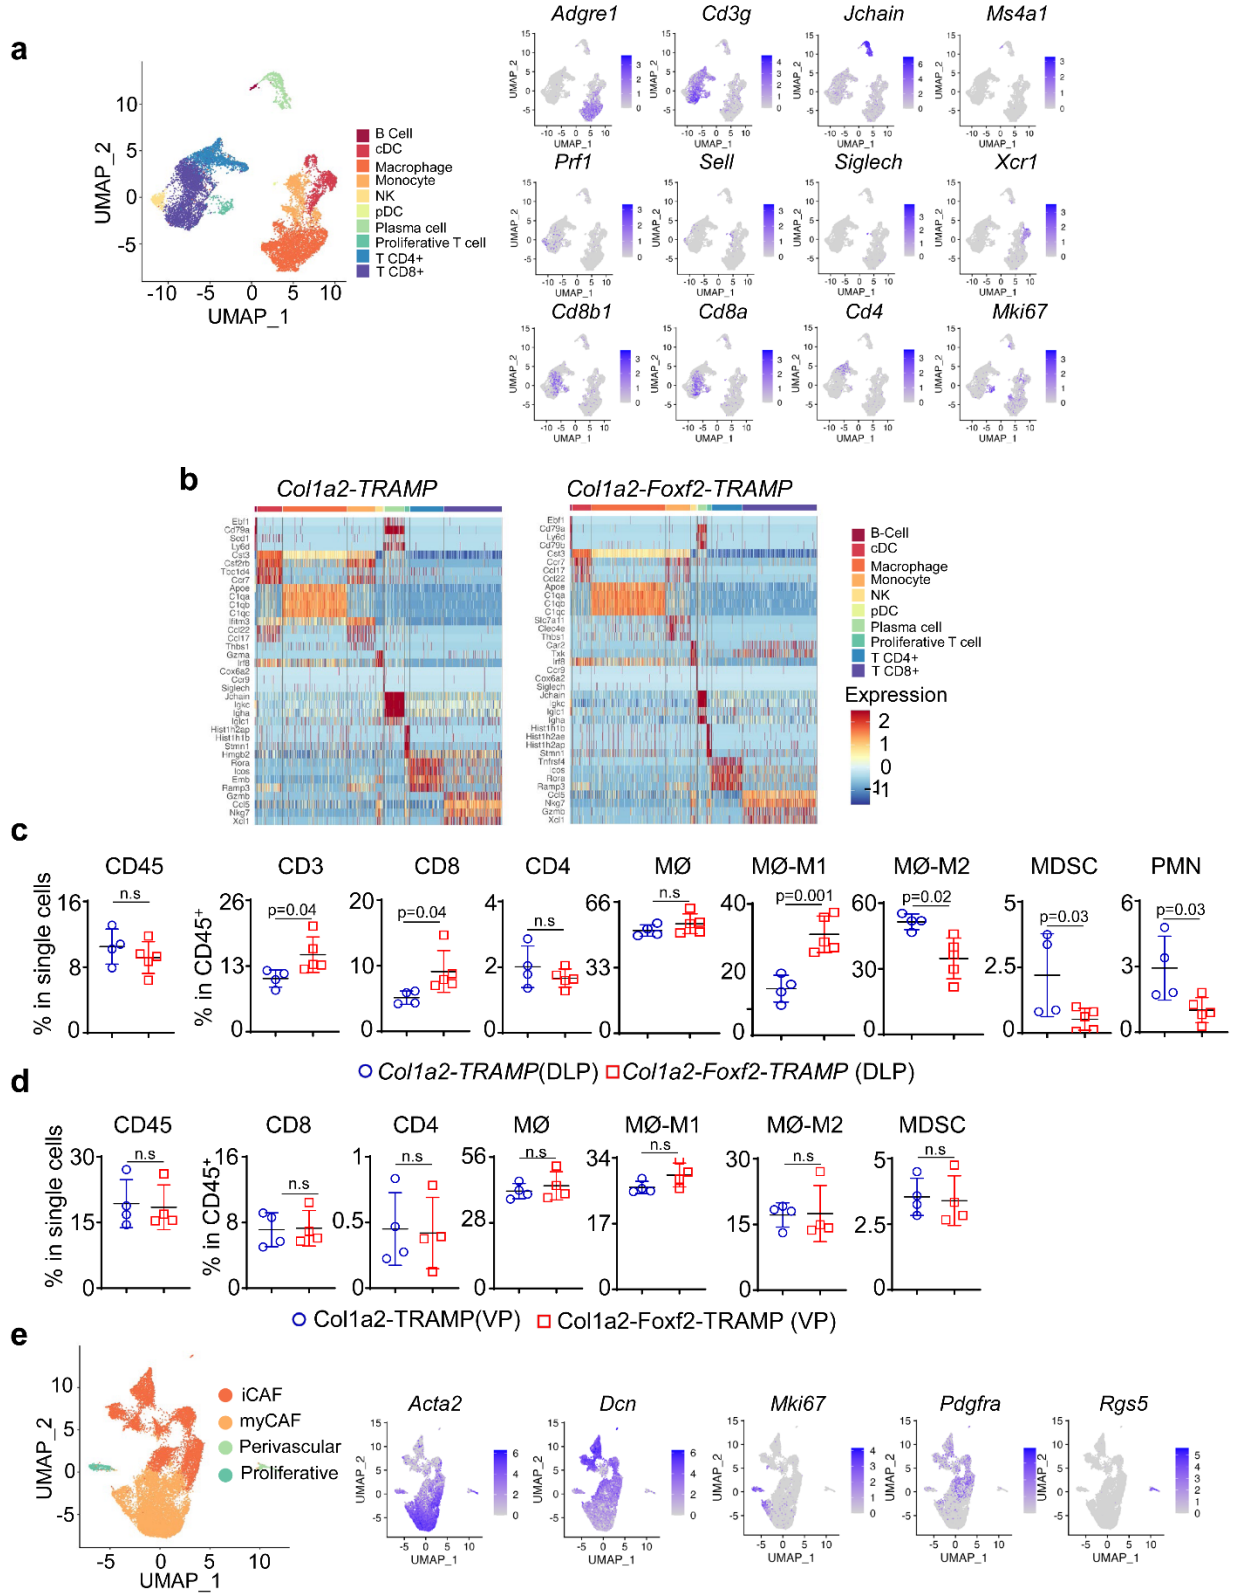

Supplementary Figure 7 continued

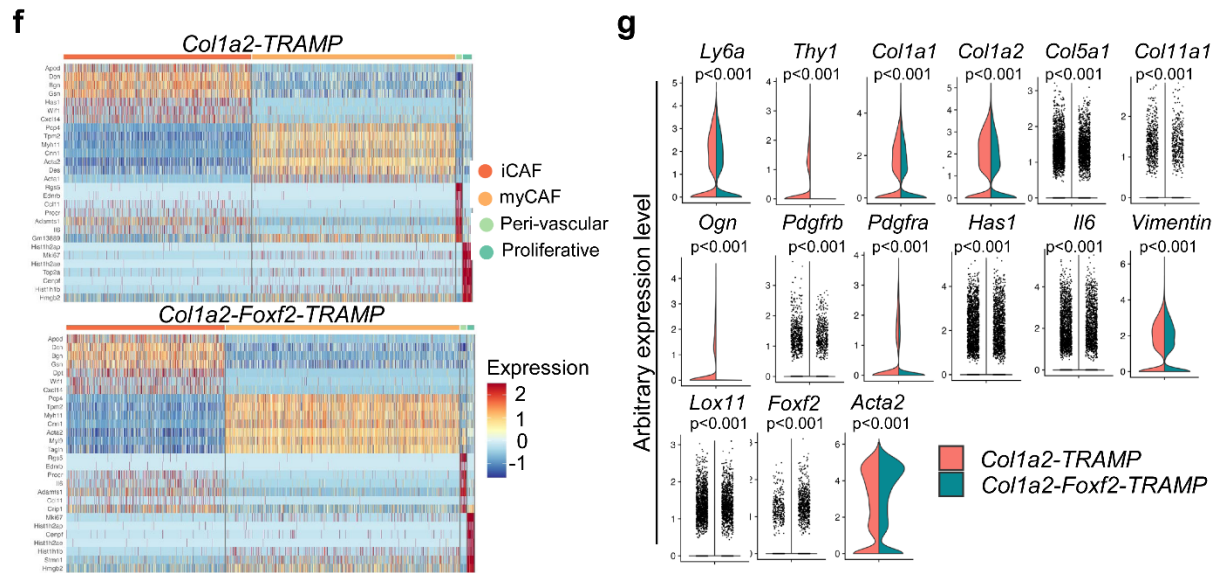

**Supplementary Fig. 7: Single cell RNA-seq analysis of immune and stromal cells in *Col1a2-Foxf2-TRAMP* and control *Col1a2-TRAMP* mice.**

(a) UMAP plot of FACS isolated CD45<sup>+</sup> cells in prostates identifies 10 subpopulations. Panels on the right show expression of representative genes in specific subpopulations. (b) Expression profile heat map of immune cell signature genes for indicated cell clusters. (c) FACS analysis of immune cell subpopulations in dorsolateral prostate cancer tissues of 9-mth-old control (*Col1a2-TRAMP*) and *Col1a2-Foxf2-TRAMP* mice. Data represent means  $\pm$  s.d. of cell percentages from 4 *Col1a2-TRAMP* and 5 *Col1a2-Foxf2-TRAMP* mice. Two-sided unpaired t-test. (d) FACS analysis of immune cell subpopulations in ventral prostate cancer tissues of 9-mth-old control (*Col1a2-TRAMP*) and *Col1a2-Foxf2-TRAMP* mice. Data represent means  $\pm$  s.d. of cell percentages from 4 mice per group. Two-sided unpaired t-test. (e) UMAP plot of FACS isolated Lin<sup>-</sup>CD49f<sup>+</sup>CD24<sup>-</sup> prostate stromal cells identifies 4 subpopulations. Panels on the right show expression of representative genes in specific subpopulations. (f) Expression profile heat map of CAF signature genes for indicated cell clusters. (g) Violin plots show expression of genes related to cancer-associated fibroblasts (CAFs) in single stromal cells isolated from 9-mth-old *Col1a2-TRAMP* and *Col1a2-Foxf2-TRAMP* mice compared using a Wilcoxon Rank Sum test within Seurat's "FindAllMarkers" function to identify differentially expressed genes. Adjusted p-value based on Bonferroni correction using all genes in the dataset.

## Supplementary Figure 8

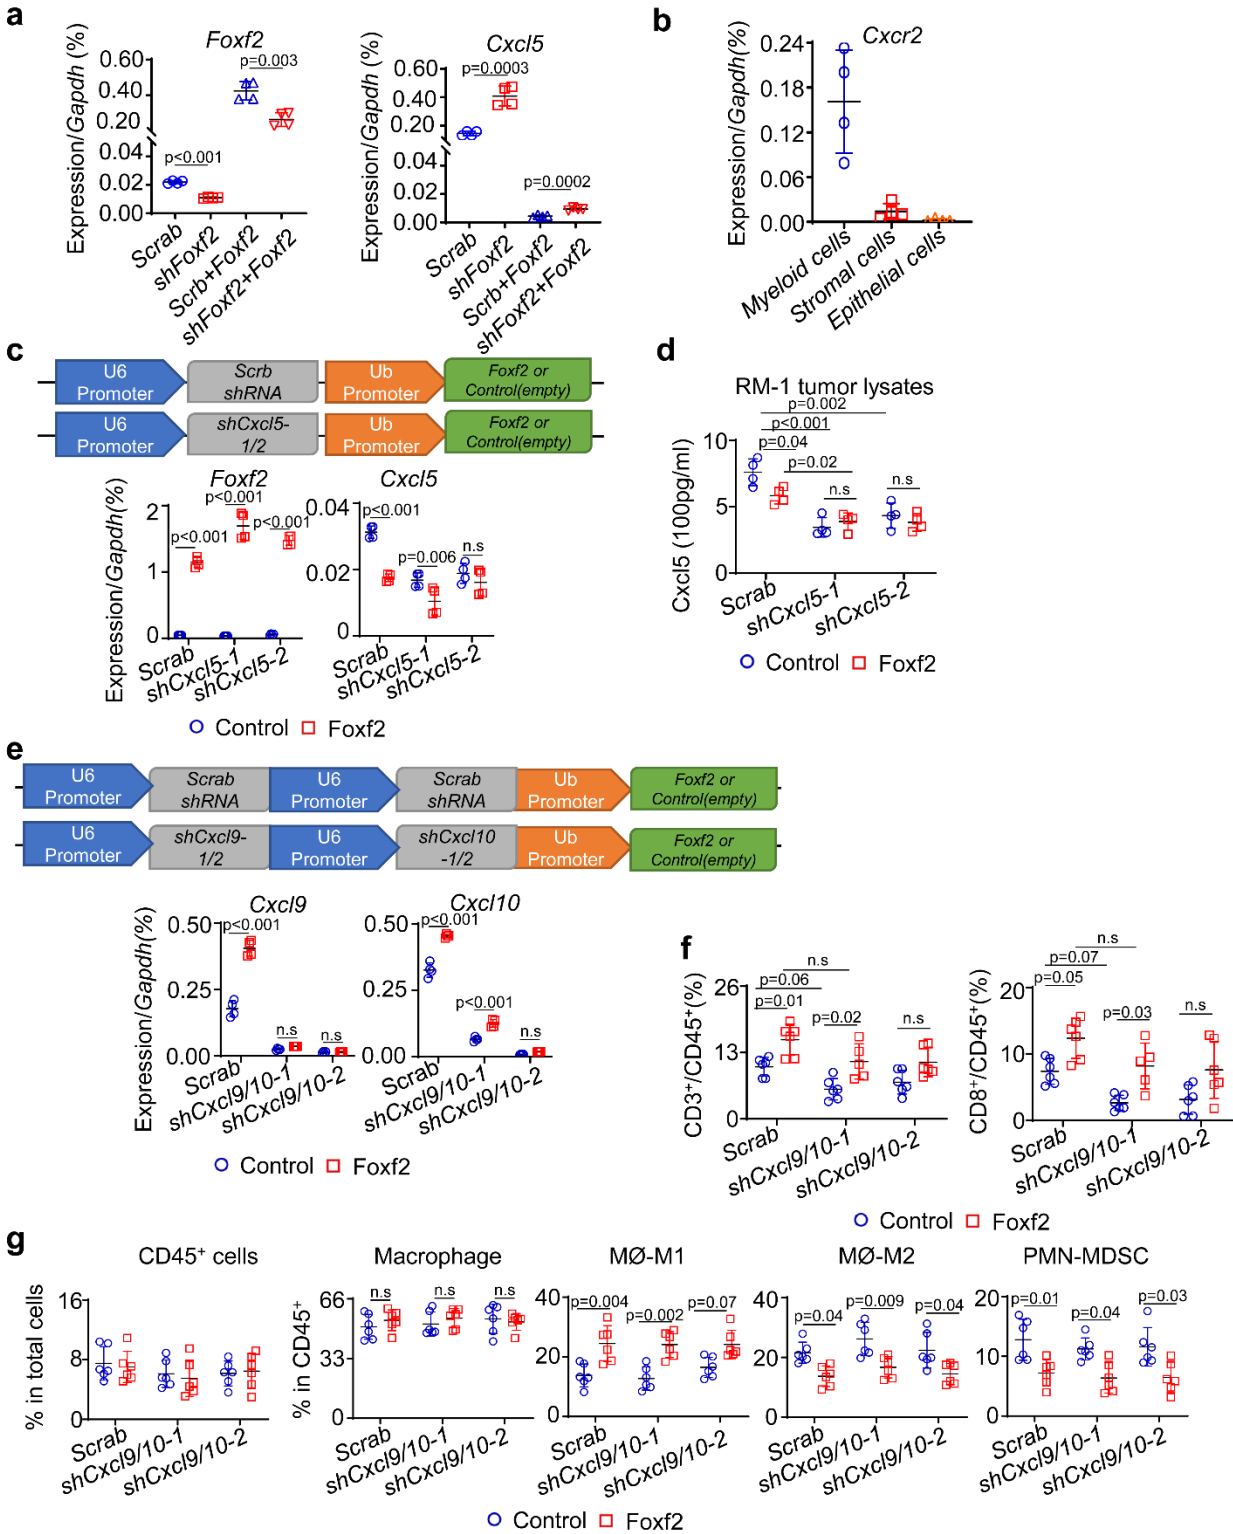

### Supplementary Fig. 8: *Cxcl5* plays a crucial role in stromal *Foxf2*-mediated tumor suppression.

(a) QRT-PCR of *Foxf2* and *Cxcl5* in mouse prostate stromal cells infected with lentivirus expressing scrambled or *Foxf2* shRNA with or without ectopically expressed *Foxf2*. Data represent

means  $\pm$  s.d. of gene expression from 4 independent experiments. Two-sided unpaired t-test. (b) QRT-PCR of *Cxcr2* in FACS-isolated myeloid, stromal, and RM-1 tumor cells from RM-1 xenografts grown subcutaneously in male C57BL/6 hosts. Data represent means  $\pm$  s.d. of gene expression from 4 independent experiments. (c) QRT-PCR of *Foxf2* and *Cxcl5* in mouse prostate stromal cells infected with lentivirus expressing scrambled or *Cxcl5* shRNA with or without *Foxf2*. Data represent means  $\pm$  s.d. of gene expression from 4 independent experiments. Two-way ANOVA with Tukey's multiple comparison test. (d) ELISA of *Cxcl5* in tumor lysates. Data represent means  $\pm$  s.d. of protein level from 4 tumors per group. Two-way ANOVA with Tukey's multiple comparison test. (e) qRT-PCR of *Foxf2* and *Cxcl9/10* in mouse prostate stromal cells infected with lentivirus expressing scrambled or *Cxcl9/10* shRNAs with or without *Foxf2*. Data represent means  $\pm$  s.d. of gene expression from 4 independent experiments. Two-way ANOVA with Tukey's multiple comparison test. (f-g) Dot plots show means  $\pm$  s.d. of percentages of CD45<sup>+</sup>, CD3<sup>+</sup>, CD8<sup>+</sup>, MDSC, PMN-MDSC, M1- and M2-macrophages cells determined by flow cytometry in RM-1 tumors grown with control and *Foxf2*-expressing stromal cells with scrambled or *Cxcl9/10* shRNAs. N= 5 to 6 per group. Two-way ANOVA with Tukey's multiple comparison test.

## Supplementary Figure 9

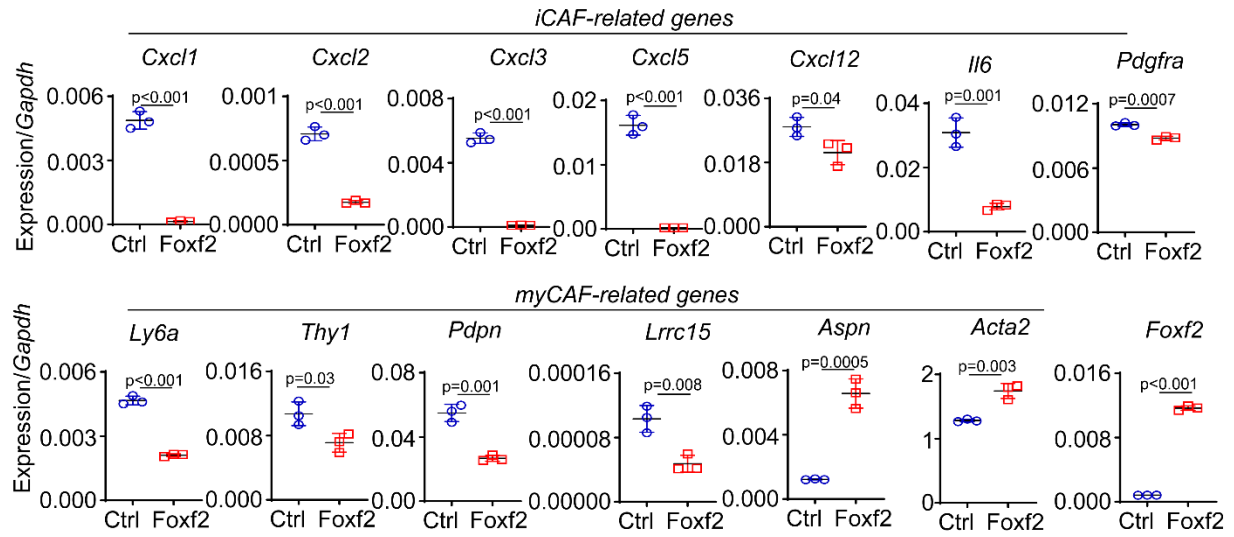

### Supplementary Fig. 9: Stromal Foxf2 expression affects CAF phenotype.

QRT-PCR of 13 CAF-associated genes in control and Foxf2-expressing mouse prostate stromal cells. Data represent means  $\pm$  s.d. from 3 experiments. Two-sided unpaired t-test.



### Supplementary Figure 10

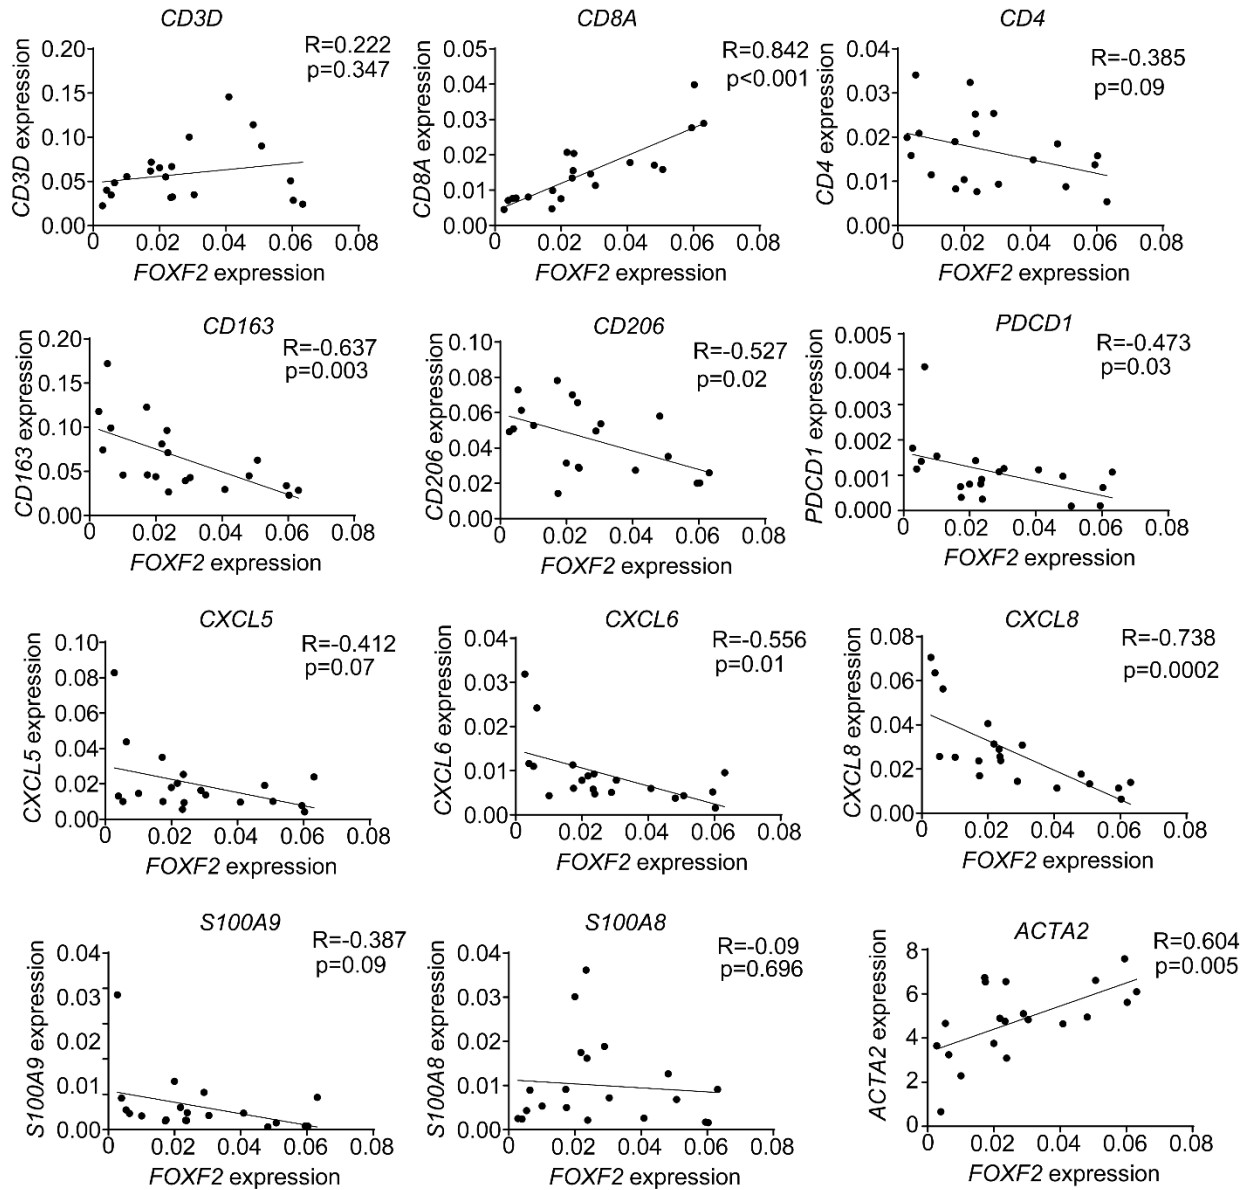

### Supplementary Fig. 10: Correlation between expression of *FOXF2* with those of immune cell markers in human prostate cancer specimens.

Each dot represent result obtained by qRT-PCR analysis from one laser-captured stromal region in human prostate cancer specimen. A total of 20 regions were collected from 13 different patient specimens including benign and cancerous tissues with Gleason patterns ranging from 3 to 5. Data analyzed by Pearson correlation analysis.

**Supplementary Figure 11**

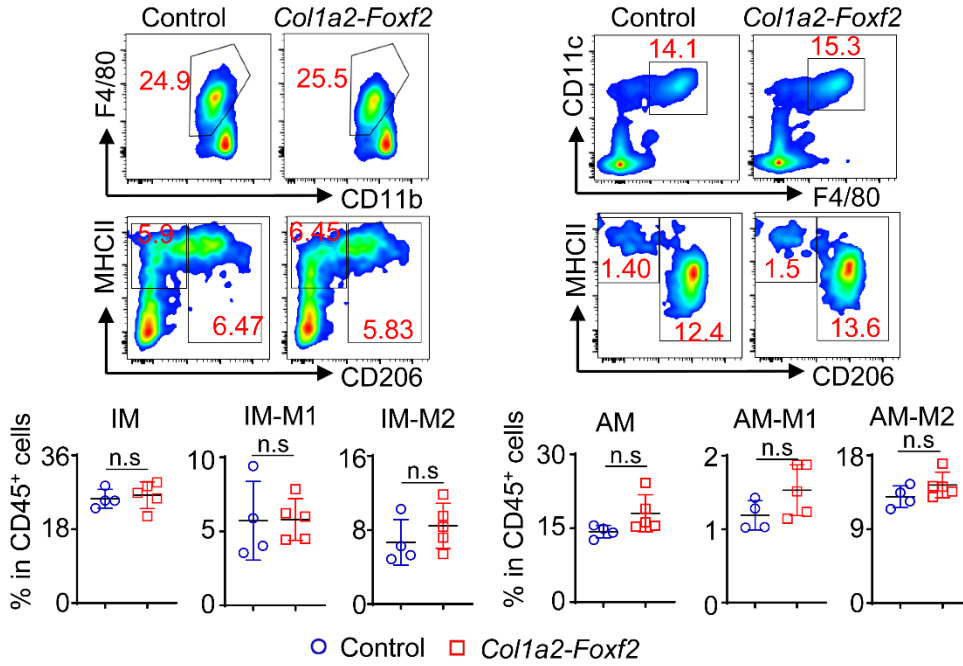

**Supplementary Fig. 11: Increasing lung stromal Foxf2 suppresses prostate cancer metastasis.** FACS plots of pro-inflammatory (M1) and anti-inflammatory (M2) infiltrating macrophage (IM) and alveolar macrophage (AM) in lung metastases. Dot plots show means  $\pm$  s.d. of cell percentages from 4 (control) or 5 (*Col1a2-Foxf2*) tumors. Two-sided unpaired t-test.

## Supplementary Figure 12

**a**

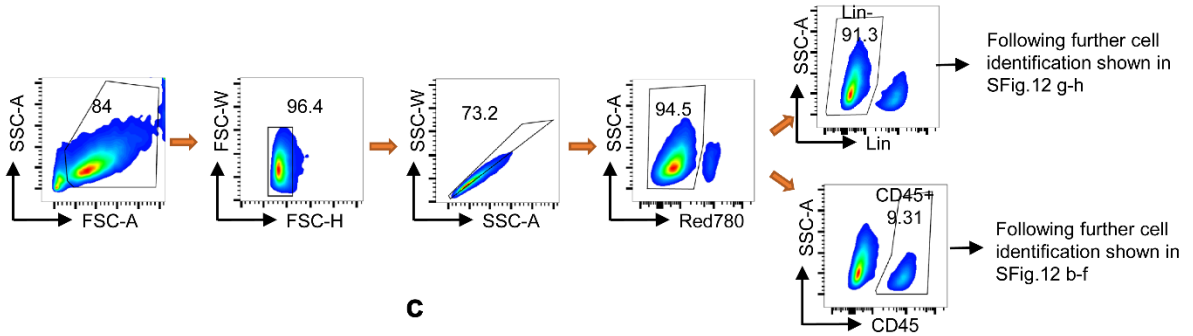

**b**

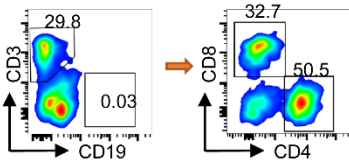

**c**

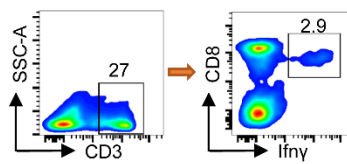

**d**

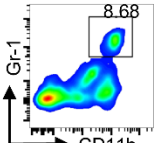

**e**

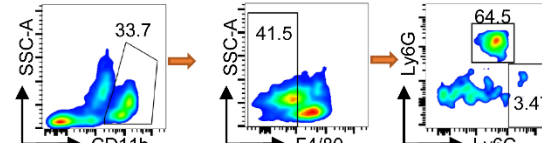

**f**

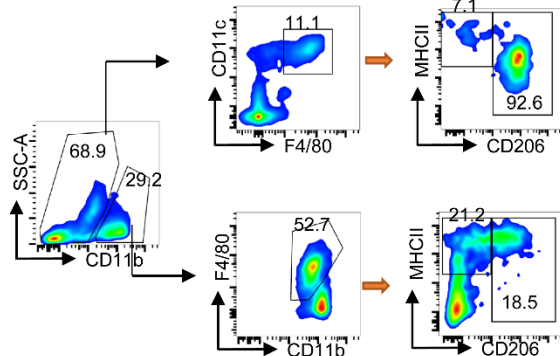

**g**

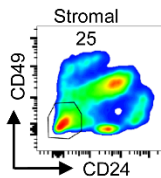

**h**

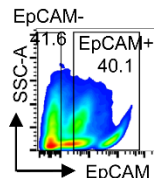

### Supplementary Fig. 12: Illustration of gating strategy for flow cytometric analyses and sorting.

(a) Single viable Lineage<sup>+</sup> or CD45<sup>+</sup> cells. (b) CD4 and CD8. (c) Ifn $\gamma$ . (d) CD11b and Gr-1. (e) Ly6C and Ly6G. (f) CD206 and MHCII. (g) CD24 and CD49 staining of mouse prostate lineages. (h) EpCAM staining of cells in RM-1 xenograft.

**Supplementary Fig. 13: Source data for Western Blot analyses in Supplementary Figs. 1A, 2C and 3B.**

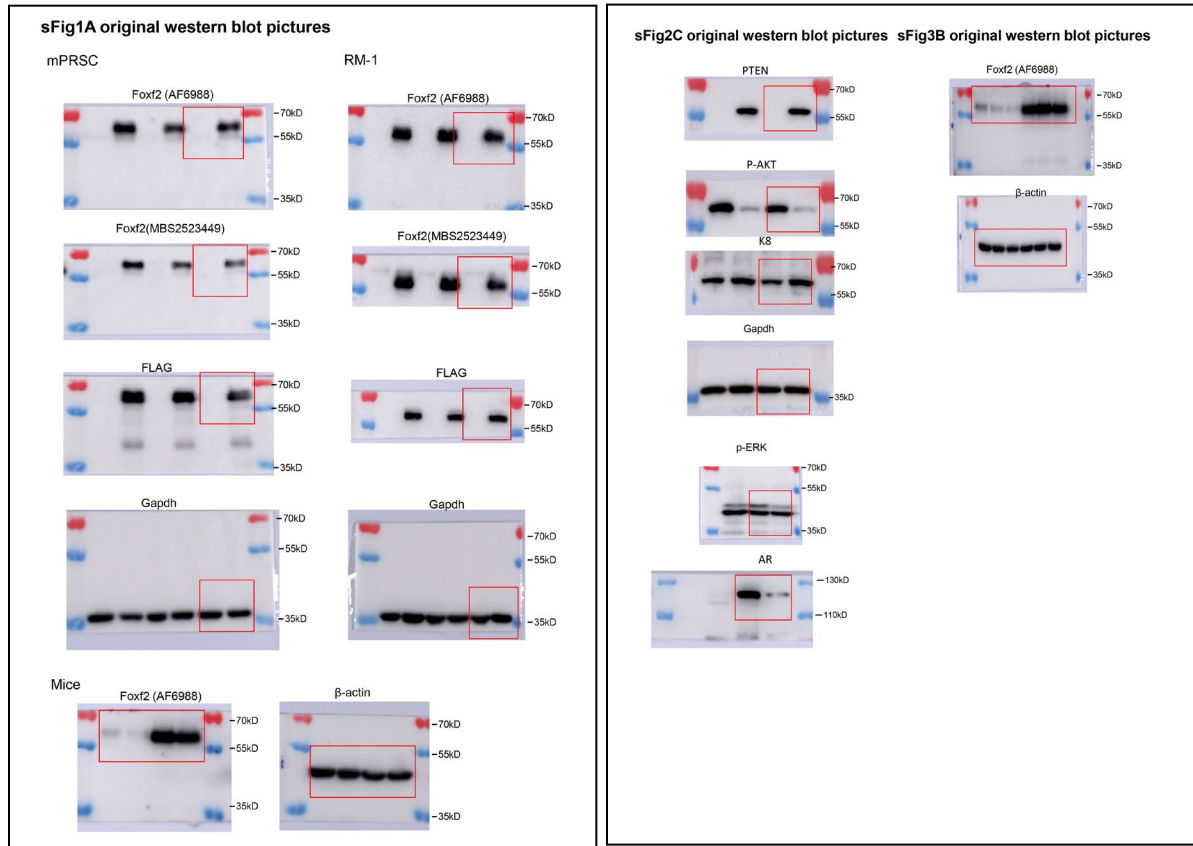

**Supplementary Table 1: Cytokine/Chemokine expression levels in Primary stromal cells(pg/ml)**

| Cytokine/<br>Chemokine | Means $\pm$ SD (n=3)           |                               | p-value,<br>(unpaired<br>t-test) |
|------------------------|--------------------------------|-------------------------------|----------------------------------|
|                        | Primary stromal cells (Vector) | Primary stromal cells (Foxf2) |                                  |
| CCL11                  | 18.23+1.3                      | 42.79+7.08                    | 0.0041                           |
| GM-CSF                 | 9.42+0.73                      | 6.75+2.1                      | 0.1058                           |
| IL-1a                  | 5.3+3.5                        | 4.6+2.42                      | 0.7907                           |
| IL-15                  | 6.07+3.28                      | 5.35+3.88                     | 0.8190                           |
| LIF                    | 88.6+4.96                      | 9925+6.74                     | 0.0923                           |
| G-CSF                  | 4.88+1.23                      | 5.27+0.7                      | 0.6575                           |
| IFN $\gamma$           | 2.43+0.42                      | 1.41+0.76                     | 0.1134                           |
| IL-1B                  | 6.77+2.54                      | 9.07+1.91                     | 0.2781                           |
| MIP-1a (CCL3)          | 58.18+10.85                    | 29.18+10.02                   | 0.0272                           |
| MCP-1                  | 3689.72+369.62                 | 4665.73+309.19                | 0.0247                           |
| IL-2                   | 2.78+1.49                      | 2.08+0.41                     | 0.4773                           |
| IL-6                   | 2812.77+99.49                  | 1893.88+179.13                | 0.0015                           |
| IL-9                   | 15.24+3.95                     | 13.24+4.82                    | 0.6082                           |
| KC (CXCL1)             | 162.54+34.33                   | 138.84+12.35                  | 0.3236                           |
| M-CSF (CSF1)           | 31.22+2.55                     | 27.69+2.35                    | 0.1524                           |
| TNF $\alpha$           | 3.59+0.23                      | 2.02+0.26                     | 0.0014                           |
| VEGF                   | 468.23+45.84                   | 718.54+94.61                  | 0.0146                           |
| MIP-2 (CXCL2)          | 44.02+13.34                    | 38.18+15.33                   | 0.6449                           |
| RANTES (CCL5)          | 50.5+3.86                      | 40.67+2.42                    | 0.0201                           |
| MIP-1b (CCL4)          | 96.24+17.23                    | 43.17+8.33                    | 0.0086                           |

|                |             |              |        |
|----------------|-------------|--------------|--------|
| LIX (CXCL5)    | 39.59+12.14 | 8.34+2.91    | 0.0087 |
| MIG (CXCL9)    | 2.27+0.3    | 3.21+0.21    | 0.0043 |
| IP-10 (CXCL10) | 197.01+9.61 | 261.45+45.23 | 0.0305 |

Cytokine/Chemokine expression levels in tumor samples(pg/ml)

| Cytokine/<br>Chemokine | Means $\pm$ SD (n=3) |                     | p-value<br>(unpaired<br>t-test) |
|------------------------|----------------------|---------------------|---------------------------------|
|                        | Tumor samples-Vector | Tumor samples-Foxf2 |                                 |
| CCL11                  | 263.22+137.29        | 349.66+91.35        | 0.1603                          |
| GM-CSF                 | 208.13+145.76        | 178.28+147.11       | 0.6897                          |
| IL-1a                  | 92.40+25.84          | 109.91+41.51        | 0.3286                          |
| IL-15                  | 38.82+10.77          | 67.06+22.11         | 0.0058                          |
| LIF                    | 239.55+44.14         | 317.76+59.32        | 0.0097                          |
| G-CSF                  | 971.28+230.6         | 999.62+487.98       | 0.8840                          |
| IFN $\gamma$           | 15.26+8.99           | 38.22+28.26         | 0.0460                          |
| IL-1B                  | 21.82+9.27           | 19.38+6.66          | 0.5553                          |
| MIP-1a (CCL3)          | 117.45+26.97         | 192.87+111.61       | 0.1078                          |
| MCP-1                  | 6030.58+1873.84      | 7701.85+2835.69     | 0.1860                          |
| IL-2                   | 15.59+3.19           | 16.11+4.22          | 0.7850                          |
| IL-6                   | 48.11+25.65          | 24.69+7.25          | 0.0262                          |
| IL-9                   | 77.80+22.47          | 71.49+9.38          | 0.4758                          |
| KC (CXCL1)             | 1456.16+748.39       | 1472.70+1172.77     | 0.9737                          |
| M-CSF (CSF1)           | 18.50+9.46           | 22.44+10.32         | 0.4387                          |
| TNF $\alpha$           | 3.51+0.91            | 5.78+2.37           | 0.0243                          |
| VEGF                   | 701.87+246.47        | 677.90+355.67       | 0.8778                          |

|                |                 |                 |        |
|----------------|-----------------|-----------------|--------|
| MIP-2 (CXCL2)  | 5721.70+4587.96 | 5383.09+5141.65 | 0.8914 |
| RANTES (CCL5)  | 17.62+10.03     | 33.57+18.97     | 0.0541 |
| MIP-1b (CCL4)  | 66.58+28.22     | 131.93+96.49    | 0.0873 |
| LIX (CXCL5)    | 666.95+188.51   | 510.27+108.05   | 0.0460 |
| MIG (CXCL9)    | 829.01+257.34   | 1705.39+712.82  | 0.0099 |
| IP-10 (CXCL10) | 540.70+190.14   | 1534.17+823.16  | 0.0090 |

**Supplementary Table 2: Genotyping Primers and expected band size**

| Primers                             | Sequences (5' to 3')           | WT(bp) | TG(bp) |
|-------------------------------------|--------------------------------|--------|--------|
| <i>Cre</i> forward                  | CATTTGGGCCAGCTAAACAT           | 308    | N/A    |
| <i>Cre</i> reverse                  | ATTCTCCCACCGTCAGTACG           |        |        |
| <i>Tramp Wild type</i> forward      | CTG TAC CAA TGG GCT TGA GG     | 264    | 151    |
| <i>Tramp common</i> reverse         | GGC ATT CAG CTT GGA GAA GA     |        |        |
| <i>Tramp Mutant</i> forward         | TCA CAA ATT TCA CAA ATA AAG CA |        |        |
| <i>Foxf2 Wild type</i> forward      | TCCCAAAGTCGCTCTGAGTT           | 219    | 300    |
| <i>Foxf2 Wild type</i> reverse      | TAAGCCTGCCCAGAAGACTC           |        |        |
| <i>Foxf2</i> <sup>lox</sup> forward | CCTACTGGTTGGAGCAGAGC           |        |        |
| <i>Foxf2</i> <sup>lox</sup> reverse | GCGATGCAATTCCTCATT             |        |        |
| <i>eYFP</i> forward                 | CTCTGCTGCCTCCTGGCTTCT          | 330    | 250    |
| <i>eYFP</i> reverse 1               | CGAGGCGGATCACAAGCAATA          |        |        |
| <i>eYFP</i> reverse 2               | TCAATGGGCGGGGGTCGTT            |        |        |



**Supplementary Table 3: Antibodies for Flow Cytometry or Sorting cells**

| Antigen                 | Supplier    | Cone number | Cat. Number | Dilution |
|-------------------------|-------------|-------------|-------------|----------|
| CD45-FITC               | Ebioscience | 30-F11      | 11-0451-85  | 1:100    |
| CD8- PE CY7             | Ebioscience | 53-6.7      | 25-0081-82  | 1:100    |
| Ly6C-PE                 | Ebioscience | HK1.4       | 12-5932-82  | 1:100    |
| GR-1-APC                | Ebioscience | RB6-8C5     | 17-5931-82  | 1:100    |
| F4/80-PE CY7            | Ebioscience | BM8         | 25-4801-82  | 1:100    |
| CD11B- eFluor 710       | Ebioscience | M1/70       | 48-0112-82  | 1:100    |
| Granzyme B-Pacific blue | Biolegend   | GB11        | 515407      | 1:100    |
| IFN- $\gamma$ -PE       | Biolegend   | XMG1.2      | 505808      | 1:100    |
| CD11C-PE                | Biolegend   | N418        | 117308      | 1:100    |
| CD3-PE                  | Ebioscience | 145-2C11    | 12-0031-83  | 1:100    |
| CD3-APC                 | Biolegend   | 145-2C11    | 100312      | 1:100    |
| CD4-PE                  | Biolegend   | GK1.5       | 100408      | 1:100    |
| CD206-APC               | Ebioscience | MR6F3       | 17-2061-82  | 1:100    |
| MHCII-PE                | Biolegend   | M5/114.15.2 | 107608      | 1:100    |
| CD19-FITC               | Biolegend   | 6D5         | 115506      | 1:100    |
| MHCII-Pecy5.5           | Biolegend   | M5/114.15.2 | 107611      | 1:100    |
| TNF $\alpha$ -FITC      | Biolegend   | MP6-XT22    | 506304      | 1:100    |
| Ly-6G- PerCP-eFluor 710 | Ebioscience | 1A8-Ly6g    | 46-9668-82  | 1:100    |
| IFN $\gamma$ -APC       | Biolegend   | XMG1.2      | 505810      | 1:100    |
| CD24-FITC               | Ebioscience | M1/69       | 11-0242-85  | 1:100    |

|                        |                |         |            |        |
|------------------------|----------------|---------|------------|--------|
| CD49-APC               | Ebioscience    | GoH3    | 17-0495-82 | 1:100  |
| CD45- eFluor 450       | Ebioscience    | 30-F11  | 48-0451-82 | 1:100  |
| CD31- eFluor 450       | Ebioscience    | 390     | 48-0311-82 | 1:100  |
| TER119- eFluor 450     | Ebioscience    | TER-119 | 48-5921-82 | 1:100  |
| EpCAM(CD326)-<br>PECY7 | Biolegend      | G8.8    | 118216     | 1:100  |
| Ghost Dye Red 780      | Cell Signaling |         | 18452      | 1:1000 |

**Supplementary Table 4:** mouse primers for qRT-PCR analysis

| Primers               | Sequences (5' to 3')    |
|-----------------------|-------------------------|
| <i>Gapdh</i> forward  | TGTTCCCTACCCCCAATGTGT   |
| <i>Gapdh</i> reverse  | GGTCCTCAGTGTAGCCCAAG    |
| <i>Foxf2</i> forward  | CCTACTCGTTGGAGCAGAGC    |
| <i>Foxf2</i> reverse  | GGAGTGGAGTGGTGCTGGTA    |
| <i>Cxcl5</i> forward  | TGCATTCCGCTTAGCTTTCT    |
| <i>Cxcl5</i> reverse  | CAGAAGGAGGTCTGTCTGGA    |
| <i>Cxcl9</i> forward  | GGAGTTCGAGGAACCCTAGTG   |
| <i>Cxcl9</i> reverse  | GGGATTTGTAGTGGATCGTGC   |
| <i>Cxcl10</i> forward | CCAAGTGCTGCCGTCATTTTC   |
| <i>Cxcl10</i> reverse | GGCTCGCAGGGATGATTTCAA   |
| <i>Cd8a</i> forward   | GACATCTCAGCCCCAGAGAC    |
| <i>Cd8a</i> reverse   | CAAGGGTGCCCAGATGTAAA    |
| <i>Lck</i> forward    | CGTGTGTGAAAACCTGCCACT   |
| <i>Lck</i> reverse    | GAGATCCCTCATAGGTGACCAG  |
| <i>Syk</i> forward    | TCCAGAGATGAATCAGAGCAGA  |
| <i>Syk</i> reverse    | GCAGGCACAGAGCATAGGAG    |
| <i>Gzmb</i> forward   | ATGTGGGGGCTTCCTTATTC    |
| <i>Gzmb</i> reverse   | TTGCTGGGTCTTCTCCTGTT    |
| <i>Ncf1</i> forward   | ACACCTTCATTCGCCATATTGC  |
| <i>Ncf1</i> reverse   | TCGGTGAATTTTCTGTAGACCAC |
| <i>Ncf4</i> forward   | GTGAACTCGGCCTGGATCTG    |
| <i>Ncf4</i> reverse   | AAGCTGCTCAAAGTCGCTCT    |

|                       |                        |
|-----------------------|------------------------|
| <i>Cybb</i> forward   | CCTCTACCAAAACCATTCGGAG |
| <i>Cybb</i> reverse   | CTGTCCACGTACAATTCGTTCA |
| <i>Il10</i> forward   | ATCGATTTCTCCCCTGTGAA   |
| <i>Il10</i> reverse   | TGTCAAATTCATTCATGGCCT  |
| <i>Arg1</i> forward   | TTTTTCCAGCAGACCAGCTT   |
| <i>Arg1</i> reverse   | AGAGATTATCGGAGCGCCTT   |
| <i>iNOS</i> forward   | TTCTGTGCTGTCCCAGTGAG   |
| <i>iNOS</i> reverse   | TGAAGAAAACCCCTTGTGCT   |
| <i>Ifng</i> forward   | CGGCACAGTCATTGAAAGCCTA |
| <i>Ifng</i> reverse   | GTTGCTGATGGCCTGATTGTC  |
| <i>Tgfb1</i> forward  | ATTCAGCGCTCACTGCTCTT   |
| <i>Tgfb1</i> reverse  | GGTTCATGTCATGGATGGTG   |
| <i>Tnfa</i> forward   | CCACCACGCTCTTCTGTCTA   |
| <i>Tnfa</i> reverse   | AGGGTCTGGGCCATAGAACT   |
| <i>Cxcl1</i> forward  | ACTGCACCCAAACCGAAGTC   |
| <i>Cxcl1</i> reverse  | TGGGGACACCTTTTAGCATCTT |
| <i>Cxcl2</i> forward  | CCAACCACCAGGCTACAGG    |
| <i>Cxcl2</i> reverse  | GCGTCACACTCAAGCTCTG    |
| <i>Cxcl3</i> forward  | GATTTTGAGACCATCCAGAGC  |
| <i>Cxcl3</i> reverse  | CTCTTCAGTATCTTCTTGATG  |
| <i>Cxcl12</i> forward | GTAAACCAGTCAGCCTGAG    |
| <i>Cxcl12</i> reverse | GCTTTCTCCAGGTA CTCTTG  |
| <i>Il6</i> forward    | TCACAAGTCGGAGGCTTAAT   |
| <i>Il6</i> reverse    | TTCTGCAAGTGCATCATCGT   |

|                        |                          |
|------------------------|--------------------------|
| <i>Pdgfra</i> forward  | ACGGATGAGAGTGAGATCGAA    |
| <i>Pdgfra</i> reverse  | CGATGACTAAGGAATCGGTCA    |
| <i>Acta2</i> forward   | TGGAAGAAGGAAACCTGGAA     |
| <i>Acta2</i> reverse   | GGAAGTGCACACTGCTGGTA     |
| <i>Ly6a</i> forward    | CCATCAATTACCTGCCCCTA     |
| <i>Ly6a</i> reverse    | GGCAGATGGGTAAGCAAAGA     |
| <i>Thy1</i> forward    | GGCGACTACTTTTGTGAGCTT    |
| <i>Thy1</i> reverse    | GGAGGAGGGAGGGGGAAAG      |
| <i>Pdpn</i> forward    | CAACCACAGGTGCTACTGGA     |
| <i>Pdpn</i> reverse    | GCTGAGGTGGACAGTTCCTC     |
| <i>Lrrc15</i> forward  | CTGCCCTGGAATGCTATGAG     |
| <i>Lrrc15</i> reverse  | CCAGCTCGTTCTTCTCCATC     |
| <i>Aspn</i> forward    | TTGGGTGCCAATGTTACTCTC    |
| <i>Aspn</i> reverse    | TTGAAGGTCAACCATTCGAGTA   |
| <i>Cxcr2</i> forward   | CCTTCTACAGCAGTGTCTGCTAC  |
| <i>Cxcr2</i> reverse   | TTGACCAAGTGTCTCTTCTGGA   |
| <i>Aldh1a1</i> forward | CCTGCAACTGAGGAGGTCAT     |
| <i>Aldh1a1</i> reverse | TGGAGAGCCAATCTGGAAAG     |
| <i>Pou5f1</i> forward  | GCTGGAGAAGTGGGTGGAG      |
| <i>Pou5f1</i> reverse  | TGCTAGTTCGCTTTCTCTTCC    |
| <i>Syp</i> forward     | TGGTGTCAATAAGAACCAGACTGT |
| <i>Syp</i> reverse     | TCCCAGTTCACGTCACACAC     |
| <i>Chga</i> forward    | CAGAAGTGTTTGAGAACCAGAGC  |
| <i>Chga</i> reverse    | TTGTCAGAATCCTTTCTCTTCTCC |

|                       |                         |
|-----------------------|-------------------------|
| <i>Eno2</i> forward   | TGGACAACCTGATGTTGGAA    |
| <i>Eno2</i> reverse   | CTGCCCCAGCCTTACACAC     |
| <i>Vim</i> forward    | GAGGTGGAGCGGGACAAC      |
| <i>Vim</i> reverse    | GAATGACTGCAGGGTGCTTT    |
| <i>Twist2</i> forward | GCAAGAAATCGAGCGAAGAT    |
| <i>Twist2</i> reverse | AGGCCTCGTTGAGCGACT      |
| <i>Slug</i> forward   | AACATTTCAACGCCTCCAAG    |
| <i>Slug</i> reverse   | TCTCTGGTTTTTGGTATGACAGG |
| <i>Zeb1</i> forward   | TTACCAGGAGGCAGTGACAG    |
| <i>Zeb1</i> reverse   | CCACATTCGGATCATGGTTT    |
| <i>Snail1</i> forward | TGGAAAGGCCTTCTCTAGGC    |
| <i>Snail1</i> reverse | GTCAGCAAAAGCACGGTTG     |
| <i>Mmp2</i> forward   | AACTTCTTCCCCCGCAAG      |
| <i>Mmp2</i> reverse   | AAAGCATCATCCACGGTTTC    |
| <i>Cd44</i> forward   | CATCAGTCACAGACCTACCCAAT |
| <i>Cd44</i> reverse   | GTTCTATACTCGCCCTTCTTGC  |
| <i>Myc</i> forward    | AGTGCTGCATGAGGAGACAC    |
| <i>Myc</i> reverse    | GGTTTGCCTCTTCTCCACAG    |

**Supplementary Table 5:** Human primers for qRT-PCR analysis

| Primers              | Sequences (5' to 3')    |
|----------------------|-------------------------|
| <i>GAPDH</i> forward | ACGGGAAGCTTGTCATCAAT    |
| <i>GAPDH</i> reverse | TGGA CTCCACGACGACTCA    |
| <i>S18</i> forward   | TGAGGAAAGCAGACATTGACC   |
| <i>S18</i> reverse   | TTGTACTGGCGTGGATTCTG    |
| <i>FOXF2</i> forward | ACTCGCTGGAGCAGAGCTAC    |
| <i>FOXF2</i> reverse | GGACGAAATCTTTTCTGTCACAC |
| <i>CD3D</i> forward  | CTGCCGACACACAAGCTCT     |
| <i>CD3D</i> reverse  | GTTCCGAGCCCAGTTTCCT     |
| <i>CD8A</i> forward  | ACTTGTGGGGTCCTTCTCCT    |
| <i>CD8A</i> reverse  | GTCTCCCGATTTGACCACAG    |
| <i>CD4</i> forward   | ATGCACTGTCTTGCAGAACC    |
| <i>CD4</i> reverse   | CACCTGTTCCCCCTCTTTCT    |
| <i>CD163</i> forward | GCTCTAGGTGCTTCATTATGTCC |
| <i>CD163</i> reverse | CCAAAGACGATGAATTGCAC    |
| <i>CD206</i> forward | TGCAGAAGCAAACCAAACCT    |
| <i>CD206</i> reverse | AGGCCTTAAGCCAACGAAAC    |
| <i>PDCD1</i> forward | CGCACGAGGGACAATAGG      |
| <i>PDCD1</i> reverse | GGAAATCCAGCTCCCCATAG    |
| <i>CXCL5</i> forward | CTGTTGGTGCTGCTGCTG      |
| <i>CXCL5</i> reverse | GGTCTGTAAACAAACGCAACG   |
| <i>CXCL6</i> forward | GCTGCTGCTCCTGCTGAC      |
| <i>CXCL6</i> reverse | TCAGCGTAACGCGTAAACA     |

|                       |                          |
|-----------------------|--------------------------|
| <i>CXCL8</i> forward  | GAACTGAGAGTGATTGAGAGTGGA |
| <i>CXCL8</i> reverse  | CTCTGCACCCAGTTTTTCCTT    |
| <i>S100A8</i> forward | CGTCTACAGGGATGACCTGA     |
| <i>S100A8</i> reverse | AACTGCACCATCAGTGTTGA     |
| <i>S100A9</i> forward | ACCAGGGGGAATTCAAAGAG     |
| <i>S100A9</i> reverse | GTCCAGGTCCTCCATGATGT     |
| <i>ACTA2</i> forward  | CCGACCGAATGCAGAAG GA     |
| <i>ACTA2</i> reverse  | ACAGAGTATTTGCGCTCCGAA    |



**Supplementary Table 6: qPCR Primers for ChIP assay**

| Primers                                 | Sequences (5' to 3')        |
|-----------------------------------------|-----------------------------|
| <i>Chr.15</i> forward                   | AGCGTGGCCTTGGCAGCAAA        |
| <i>Chr.15</i> reverse                   | TGCGATTGGCTTCCTCTCCCC       |
| <i>mPDGF<math>\alpha</math></i> forward | CCCATCATCCTCTCCTCTTTGC      |
| <i>mPDGF<math>\alpha</math></i> reverse | GGTAGCCTTTAGAAATGTGTGCCAG   |
| <i>CXCL5</i> site1 forward              | TTCTTTCTTTCTTTCTTTCTTTCTTTC |
| <i>CXCL5</i> site1 reverse              | GGAAATGTAATCCCGGACTTG       |
| <i>CXCL5</i> site2 forward              | GTCCGGGATTACATTTCTG         |
| <i>CXCL5</i> site2 reverse              | GATAAGCAGACATACACATGCTCA    |

**Supplementary Table 7: Primers for cloning CXCL5 Luciferase Reporters**

| Primers                           | Sequences (5' to 3')                 |
|-----------------------------------|--------------------------------------|
| <i>Foxf2</i> Site 1 mutagenesis F | TTTTTATCTTTTCAAGTCCGG                |
| <i>Foxf2</i> Site 1 mutagenesis R | AAAAGAAAGAAAGAAAGAAAGAAAG            |
| <i>Foxf2</i> Site 2 mutagenesis F | TTTGAGCATGTGTATGTCTGC                |
| <i>Foxf2</i> Site 2 mutagenesis R | AAAAAAAAATACATTTGAAATGTGTGTTTTTAAAAC |
| <i>NFκB</i> Site deletion F       | GCATCTTCAAGCTCCGCT                   |
| <i>NFκB</i> Site deletion R       | GACTTGGAGTTAGGAGGTG                  |

**Supplementary Table 8: Antibodies for IHC and Western Blot**

| Antigen             | Supplier       | Cat. Number/Clone Number     | Species | Dilution |
|---------------------|----------------|------------------------------|---------|----------|
| AR                  | Santa Cruz     | sc-816                       | Rabbit  | 1:1000   |
| AR                  | Santa Cruz     | sc-13062                     | Rabbit  | 1:200    |
| K5                  | 905501         | Biolegend                    | Rabbit  | 1:1000   |
| K8                  | Covance        | MMS-162P/1E8                 | Mouse   | 1:1000   |
| K8                  | Abcam          | AB53280                      | Rabbit  | 1:500    |
| CD31                | Abcam          | AB28364                      | Rabbit  | 1:300    |
| GFP                 | Abcam          | ab13970                      | Chicken | 1:1000   |
| BrdU                | Abcam          | ab6326                       | Rat     | 1:500    |
| Cleaved Caspase 3   | Cell Signaling | 9661S                        | Rabbit  | 1:1000   |
| SV40 T-antigen      | Abcam          | ab16879/PAb416               | Mouse   | 1:300    |
| Smooth Muscle Actin | Sigma          | 202M/1A4                     | Mouse   | 1:1000   |
| Synaptophysin       | Novocastra     | <i>NCL-L-SYNAP-299/27G12</i> | Mouse   | 1:300    |
| Flag                | Sigma          | F1804/M2                     | Mouse   | 1:1000   |
| Foxf2               | Abcam          | ab198283                     | Rabbit  | 1:500    |
| Foxf2               | R&D            | AF6988                       | Sheep   | 1:100    |
| Foxf2               | MyBioSource    | MBS2523449                   | Rabbit  | 1:500    |
| CTLA-4              | Bio X Cell     | BE0131                       | Hamster | 200ug    |
| Hamster IgG Isotype | Bio X Cell     | BE0087                       | Hamster | 200ug    |
| PD-1                | Bio X Cell     | BE0146                       | Rat     | 200ug    |
| rat IgG2a isotype   | Bio X Cell     | BE0089                       | Rat     | 200ug    |

|                                         |                   |                   |        |        |
|-----------------------------------------|-------------------|-------------------|--------|--------|
| $\beta$ -actin                          | Sigma             | A2228/AC-74       | Mouse  | 1:1000 |
| GAPDH                                   | Cell Signaling    | 2118              | Rabbit | 1:1000 |
| normal rabbit IgG                       | Santa Cruz        | sc-2027           | Rabbit | 1:30   |
| normal donkey Serum                     | Jackson Imm       | 017-000-121       | Donkey | 1:30   |
| PTEN                                    | Cell Signaling    | 9556/26H9         | Mouse  | 1:1000 |
| p-AKT                                   | Cell Signaling    | 4060              | Rabbit | 1:1000 |
| p-Erk1/2                                | Cell Signaling    | 4370              | Rabbit | 1:1000 |
| p-P65                                   | Invitrogen        | MA5-15160/T.849.2 | Rabbit | 1:1000 |
| P65                                     | Cell Signaling    | 8242              | Rabbit | 1:1000 |
| p-Stat3                                 | Cell Signaling    | 4113              | Rabbit | 1:1000 |
| Stat3                                   | Cell Signaling    | 8768              | Rabbit | 1:1000 |
| $\alpha$ -Mouse IgG<br>Alexa Fluor 594  | Life technologies | A11020            | Goat   | 1:500  |
| $\alpha$ -Mouse IgG<br>Alexa Fluor 488  | Life technologies | A11029            | Goat   | 1:500  |
| $\alpha$ -Rabbit IgG<br>Alexa Fluor 594 | Life technologies | A11037            | Goat   | 1:500  |
| $\alpha$ -Rat IgG<br>Alexa Fluor 594    | Life technologies | A11006            | Goat   | 1:500  |
| $\alpha$ -Sheep IgG<br>Alexa Fluor 488  | Life technologies | A11015            | Donkey | 1:1500 |
| $\alpha$ -Rabbit HRP                    | Vector Lab.       | PI-1000           | Goat   | 1:5000 |
| $\alpha$ -Mouse HRP                     | Vector Lab.       | PI-2000           | Goat   | 1:5000 |
| $\alpha$ -Sheep IgG HRP                 | Invitrogen        | A16041            | Donkey | 1:5000 |
